# Supplementary material
Source: publisher site journal article supplement (https://www.dovepress.com/article/497033)
Supplement: Supplementary file 1 [file get_supplementary_file.php]

# eTable 1. CLEAR Study Working Group members and affiliations

| Mona Al-ahmad | Microbiology Department, Faculty of Medicine, Kuwait University, Kuwait City, Kuwait; Al-Rashed Allergy Center, Ministry of Health, Kuwait City, Kuwait |
| --- | --- |
| Riyad Al-Lehebi | Department of Pulmonology, King Fahad Medical City, Riyadh, Saudi Arabia; College of Medicine, Alfaisal University, Riyadh, Saudi Arabia |
| Leif Bjermer | Department of Clinical Sciences, Respiratory Medicine and Allergology, Skåne University Hospital, Lund University, Lund, Sweden |
| Anne-Sofie Bjerrum | Department of Respiratory Medicine and Allergy, Aarhus University Hospital, Aarhus, Denmark |
| Sinthia Bosnic-Anticevich | Quality Use of Respiratory Medicines Group, Woolcock Institute of Medical Research, Glebe, NSW, Australia; Macquarie University, Macquarie Park, NSW, Australia |
| John Busby | Centre for Public Health, Queen’s University Belfast, Belfast, UK |
| Giorgio Walter Canonica | Personalized Medicine, Asthma and Allergy, Humanitas Clinical and Research Center IRCCS, Milan, Italy; Department of Biomedical Sciences, Humanitas University, Milan, Italy |
| Carlos Andrés Celis-Preciado | Pulmonary Unit, Hospital Universitario San Ignacio, Bogota, Colombia; Faculty of Medicine, Pontificia Universidad Javeriana, Hospital Universitario San Ignacio, Bogota, Colombia |
| Kenneth R. Chapman | University of Toronto, Toronto, ON, Canada |
| George C. Christoff | Faculty of Public Health, Medical University Sofia, Sofia, Bulgaria |
| Borja G. Cosio | Son Espases University Hospital-IdISBa-Ciberes, Mallorca, Spain |
| Richard Costello | Department of Respiratory Medicine, Clinical Research Centre, Beaumont Hospital, RCSI, Dublin, Ireland |
| Andréanne Côté | Department of Medicine, Laval University, Quebec City, QC, Canada |
| Delbert Dorscheid | Center for Heart Lung Innovation, University of British Columbia, Vancouver, BC, Canada |
| J. Mark FitzGerald | Department of Medicine, University of British Columbia, Vancouver, BC, Canada |
| Mina Gaga | 7th Respiratory Medicine Department, Sotiria General Hospital of Chest Diseases of Athens, Athens, Greece |
| Peter G. Gibson | School of Medicine and Public Health, University of Newcastle, New Lambton, NSW, Australia; Department of Respiratory & Sleep Medicine, Hunter Medical Research Institute, John Hunter Hospital, New Lambton, NSW, Australia |
| Yahya Habis | Division of Pulmonology, Department of Medicine, Faculty of Medicine, King Abdulaziz University, Jeddah, Saudi Arabia |
| Liang-Wen Hang | Sleep Medicine Center, Department of Pulmonary and Critical Care Medicine, China Medical University Hospital, Taichung, Taiwan |
| Liam G. Heaney | Wellcome-Wolfson Centre for Experimental Medicine, Queen’s University Belfast, Belfast, UK |
| Enrico Heffler | Personalized Medicine, Asthma and Allergy, Humanitas Clinical and Research Center IRCCS, Milan, Italy; Department of Biomedical Sciences, Humanitas University, Milan, Italy |
| Mark Hew | Allergy, Asthma & Clinical Immunology Service, Alfred Health, Melbourne, VIC, Australia; Public Health and Preventive Medicine, Monash University, Melbourne, VIC, Australia |
| Erick Wan-Chun Huang | Division of Pulmonary Medicine, Department of Internal Medicine, Shuang Ho Hospital, Taipei Medical University, New Taipei City, Taiwan |
| Takashi Iwanaga | Center for General Medical Education and Clinical Training, Kindai University Hospital, Osakasayama, Japan |
| David Jackson | UK Severe Asthma Network and National Registry, Guy’s and St Thomas’ NHS Foundation Trust, London, UK; School of Immunology & Microbial Sciences, King’s College London, London, UK |
| Claus Rikard Johnsen | Allergy Clinic, Gentofte University Hospital, Hellerup, Denmark |
| Rupert C. Jones | Research and Knowledge Exchange, Plymouth Marjon University, Plymouth, UK |
| Mariko Siyue Koh | Respiratory & Critical Care Medicine, Singapore General Hospital, Singapore; Duke-NUS Medical School, Singapore |
| Konstantinos Kostikas | Respiratory Medicine Department, University of Ioannina, Ioannina, Greece |
| Piotr Kuna | Division of Internal Medicine, Asthma and Allergy, Medical University of Łódź, Łódź, Poland |
| Sverre Lehmann | Section of Thoracic Medicine, Department of Clinical Science, University of Bergen, Bergen, Norway |
| Lauri Lehtimäki | Allergy Centre, Tampere University Hospital, Tampere, Finland; Faculty of Medicine and Health Technology, Tampere University, Tampere, Finland |
| Désirée Larenas Linnemann | Centre of Excellence in Asthma and Allergy, Médica Sur Hospital, Mexico City, Mexico |
| Bassam Mahboub | College of Medicine, University of Sharjah, Sharjah, UAE; Rashid Hospital, Dubai Health Authority, Dubai, UAE |
| Neil Martin | Respiratory and Immunology, BioPharmaceuticals Medical, AstraZeneca, Cambridge, UK; University of Leicester, Leicester, UK |
| Ekaterina Maslova | BioPharmaceuticals Medical, AstraZeneca, Cambridge, UK |
| Jorge Maspero | Clinical Research for Allergy and Respiratory Medicine, CIDEA Foundation, Buenos Aires, Argentina; Buenos Aires University School of Medicine, Buenos Aires, Argentina |
| Andrew N. Menzies-Gow | Royal Brompton and Harefield Hospitals, London, UK; Respiratory and Immunology, BioPharmaceuticals Medical, AstraZeneca, Cambridge, UK |
| Patrick D. Mitchell | School of Medicine, Trinity College, Dublin, Ireland |
| Nikolaos G. Papadopoulos | Division of Infection, Immunity & Respiratory Medicine, University of Manchester, Manchester, UK; Allergy Department, 2nd Pediatric Clinic, University of Athens, Athens, Greece |
| Andriana I. Papaioannou | 2nd Respiratory Medicine Department, National and Kapodistrian University of Athens Medical School, Attikon University Hospital, Athens, Greece |
| Patricia Parada-Tovar | CINEUMO, Respiratory Research Center, Fundación Neumológica Colombiana, Bogotá, Colombia |
| Pujan H. Patel | Royal Brompton and Harefield Hospitals, London, UK |
| Luis Perez-de-Llano | Department of Respiratory Medicine, University Hospital Lucus Augusti, Lugo, Spain |
| Diahn-Warng Perng (Steve) | Division of Clinical Respiratory Physiology, Department of Chest Medicine, Taipei Veterans General Hospital, Taipei, Taiwan; COPD Assembly of the Asian Pacific Society of Respirology, Tokyo, Japan |
| Matthew Peters | Department of Thoracic Medicine, Concord Hospital, Sydney, NSW, Australia |
| Paul Pfeffer | Department of Respiratory Medicine, Barts Health NHS Trust, London, UK; Barts and the London School of Medicine and Dentistry, Queen Mary University of London, London, UK |
| Ted Popov | St. Ivan Rilski University Hospital, Sofia, Bulgaria |
| Celeste Porsbjerg | Respiratory Research Unit, Bispebjerg Hospital, Copenhagen, Denmark |
| Chin Kook Rhee | Department of Internal Medicine, Division of Pulmonary and Critical Care Medicine, Seoul St. Mary’s Hospital, College of Medicine, the Catholic University of Korea, Seoul, South Korea |
| Mohsen Sadatsafavi | Respiratory Evaluation Sciences Program, Faculty of Pharmaceutical Sciences, University of British Columbia, Vancouver, BC, Canada |
| Sundeep Salvi | Pulmocare Research and Education Foundation, Pune, India |
| Ana Sá-Sousa | MEDCIDS – Department of Community Medicine, Information and Health Decision Sciences; Faculty of Medicine, University of Porto, Porto, Portugal; CINTESIS@RISE – Health Research Network, Faculty of Medicine, University of Porto, Porto, Portugal |
| Camille Taille | Department of Respiratory Diseases, Bichat Hospital, AP-HP Nord-Université de Paris, Paris, France |
| Christian Taube | Department of Pulmonary Medicine, University Medical Center Essen-Ruhrlandklinik, Essen, Germany |
| Tunn Ren Tay | Department of Respiratory and Critical Care Medicine, Changi General Hospital, Singapore |
| Carlos A. Torres-Duque | CINEUMO, Respiratory Research Center, Fundación Neumológica Colombiana, Bogotá, Colombia |
| Eric Van Ganse | PELyon, Lyon, France; Research on Healthcare Performance RESHAPE, INSERM U1290, Université Claude Bernard Lyon 1, Lyon, France; Respiratory Medicine, Croix Rousse University Hospital, Lyon, France |
| Eileen Wang | Department of Medicine, Division of Allergy and Clinical Immunology, National Jewish Health, Denver, CO, USA; Department of Internal Medicine, Division of Allergy and Clinical Immunology, University of Colorado School of Medicine, Aurora, CO, USA |
| Michael W. Wechsler | Department of Medicine, Cohen Family Asthma Institute, National Jewish Health, Denver, CO, USA |
| Alexandra Wimmer-Aune | Department of Respiratory Medicine, Aalborg University Hospital, Aalborg, Denmark |
